# Supplementary material for: Study on Molecular Mechanism of Benzo (ɑ) pyrene on CMA by HSP90ɑ and HIF-1ɑ
Source: Research Square preprint supplement (doi:10.21203/rs.3.rs-763034/v1), 2021-08-10
Supplement: Supplementary file 2 [file b14f8aaa9192e407cac02be8.xlsx]

## Sheet: 10A
Control	0.1 μM BaP	1 μM BaP	10 μM BaP
		18.8809
17.6173	19.0614		19.2419
17.9783	19.9639	18.7004	20.5054
17.9783	18.3394	19.6029	20.1444

## Sheet: 10B
Control	0.1 μM BaP	1 μM BaP	10 μM BaP
0.263844	0.374732	0.482515	0.579302
0.284015	0.372987	0.383364	0.404828
0.288473	0.513873	0.467998	0.487472

## Sheet: 10C
Control	0.1 μM BaP	1 μM BaP	10 μM BaP
1	1.5054	1.5754	1.80454
1	1.23547	1.39434	1.54534
1	1.4064	1.46453	1.60323
