# Supplementary material for: Study on Molecular Mechanism of Benzo (ɑ) pyrene on CMA by HSP90ɑ and HIF-1ɑ
Source: Research Square preprint supplement (doi:10.21203/rs.3.rs-763034/v1), 2021-08-10
Supplement: Supplementary file 3 [file cc383845805c37a38022b3d5.xlsx]

## Sheet: 12B
Control	BaP	BAY87-2243	BaP+BAY87-2243
1	1.59005	1.31504	1.09429
1	1.34723	1.1487	1.30528
1	1.51572	1.02101	1.18921

## Sheet: 12C
Control	BaP	BAY87-2243	BaP+BAY87-2243
1	1.08673	0.790041	0.846745
1	1.33793	0.707107	0.90125
1	1.20581	0.870551	0.933033

## Sheet: 12D
Control	BaP	BAY87-2243	BaP+BAY87-2243
1	1.29235	0.986233	0.888843
1	1.12506	0.779165	0.939523
1	1.24833	0.835088	0.926588

## Sheet: 12E
Control	BaP	BAY87-2243	BaP+BAY87-2243
1	1.75318	1.21396	1.30701
1	1.56541	0.920188	1.04247
1	1.54718	0.97942	1.13288

## Sheet: 12F
Control	BaP	BAY87-2243	BaP+BAY87-2243
1	1.4473	1.00247	1.05883
1	1.53979	1.21445	1.24472
1	1.39737	1.16053	1.05276

## Sheet: 12G
Control	BaP	BAY87-2243	BaP+BAY87-2243
1	1.96427	1.67959	1.75235
1	1.81904	1.13621	1.25453
1	1.75159	1.36656	1.52497

## Sheet: 12H
Control	BaP	BAY87-2243	BaP+BAY87-2243
1	1.73847	0.981557	1.13007
1	1.69926	1.29537	1.32679
1	1.86494	1.04941	1.03921

## Sheet: 12I
Control	BaP	BAY87-2243	BaP+BAY87-2243
1	1.75318	0.981396	1.30701
1	1.56541	0.920188	1.04247
1	1.54718	0.87942	1.13288
