# Supplementary material for: Study on Molecular Mechanism of Benzo (ɑ) pyrene on CMA by HSP90ɑ and HIF-1ɑ
Source: Research Square preprint supplement (doi:10.21203/rs.3.rs-763034/v1), 2021-08-10
Supplement: Supplementary file 4 [file db27c4d221eb83418d0ffecf.xlsx]

## Sheet: 9A
	Weak Positive			Moderate Positive			Strong Positive
shControl	51.73	40.73	45.73	45.2008	38.2008	50.2008	3.0692	21.0692	4.0692
shControl+BaP	18.5672	20.5672	20.5672	46.4279	45.4279	55.4279	35.005	34.005	24.005
shHSP90α	54.0925	50.0925	40.0925	40.6992	38.6992	50.6992	5.20836	11.2084	9.20836
shHSP90α+BaP	34.3347	31.3347	40.3347	56.946	60.946	48.946	8.71921	7.71921	10.7192

## Sheet: 9B
	Weak Positive			Moderate Positive			Strong Positive
shControl	24.2247	19.1333	35.7691	38.1333	32.2008	42.2008	37.642	48.666	22.0301
shControl+BaP	12.4688	11.5672	10.5672	22.4993	28.4279	24.4279	65.0319	60.005	65.005
shHSP90α	46.6497	50.3347	45.3347	34.716	35.6992	40.6992	18.6343	13.9661	13.9661
shHSP90α+BaP	31.6474	31.0925	25.0925	43.7861	45.946	38.946	24.5665	22.9615	35.9615

## Sheet: 9C
	Weak Positive			Moderate Positive			Strong Positive
shControl	11.2266	18.73	15.73	77.131	70.2008	65.2008	11.6424	11.0692	19.0692
shControl+BaP	6.56716	5.56716	10.5672	34.4279	30.4279	40.4279	59.005	64.005	49.005
shHSP90α	11.3347	13.3347	10.3347	60.6992	50.6992	65.6992	27.9661	35.9661	23.9661
shHSP90α+BaP	8.09248	5.09248	11.0925	61.946	50.946	70.946	29.9615	43.9615	17.9615
