# Supplementary material for: Study on Molecular Mechanism of Benzo (ɑ) pyrene on CMA by HSP90ɑ and HIF-1ɑ
Source: Research Square preprint supplement (doi:10.21203/rs.3.rs-763034/v1), 2021-08-10
Supplement: Supplementary file 6 [file 0ee4a21dff9fde697404f3c7.xlsx]

## Sheet: 3C
days	shControl		shControl+BaP		shHSP90α		shHSP90α+BaP
10	34.64	22.2555	34.41	12.2722	25.61	15.8039	28.26	8.81098
20	49.97	8.97431	95.29	60.0454	41.8	4.25699	35.83	9.56556
30	124.73	24.7849	187.47	18.7167	59.41	10.3731	62.58	36.3686
40	231.36	52.5214	408.24	81.6384	204.36	53.4451	181.46	83.3491
50	353.09	94.0316	773.36	272.127	260.86	141.726	385.29	100.951
60	667.9	174.234	1172.38	488.725	424.48	138.945	732.13	172.137

## Sheet: 3D
shControl	shControl+BaP	shHSP90α	shHSP90α+BaP
0.16418	1.3988	0.0834	0.595
0.2574	0.733	0.271	0.5945
0.3112	0.8962	0.3526	0.3526
0.695	0.7288	0.1874	0.4924
0.3686	1.0742	0.1615
0.4924	1.0362	0.3448
0.534	1.016	0.4476
0.6574		0.541

## Sheet: 3E
shControl	shControl+BaP	shHSP90α	shHSP90α+BaP
	380000	182000	317000
227000	574000	208000	352000
230000	552000		311000
275000
