# Supplementary material for: Study on Molecular Mechanism of Benzo (ɑ) pyrene on CMA by HSP90ɑ and HIF-1ɑ
Source: Research Square preprint supplement (doi:10.21203/rs.3.rs-763034/v1), 2021-08-10
Supplement: Supplementary file 7 [file e974735083d561542ad0681a.xlsx]

## Sheet: 5B
shControl	shControl+BaP	shHSP90α	shHSP90α+BaP
1	1.52626
1	1.81504	0.358565	0.357018
1	2.08493	0.446745	0.356604
1	1.94531	0.47018	0.401342
1	1.79005	0.20107	0.586735

## Sheet: 5C
shControl	shControl+BaP	shHSP90α	shHSP90α+BaP
1	1.46409	0.659754
1	1.6358	0.90125	1.01396
1	1.26576	0.895025	0.946058
1	1.44393	0.702222	1.33793
1		1.05702	0.90125

## Sheet: 5D
shControl	shControl+BaP	shHSP90α	shHSP90α+BaP
1	1.29235	1.00696	1.18343
1	1.52626	0.965936	1.21419
1	1.6245	1.14076	1.25701
1	1.48452	1.04718	1.08511
1	1.16473	0.888843	0.946058

## Sheet: 5E
shControl	shControl+BaP	shHSP90α	shHSP90α+BaP
1	1.38136	0.208057	0.278113
1	1.76037	0.397971	0.446237
1	1.30827	0.392572	0.39371

## Sheet: 5F
shControl	shControl+BaP	shHSP90α	shHSP90α+BaP
1	1.85865	0.845615	0.947437
1	1.72509	0.698981	0.738347
1	1.70876	1.00389	1.09068

## Sheet: 5G
shControl	shControl+BaP	shHSP90α	shHSP90α+BaP
1	1.65571	0.839574	1.17663
1	2.17382	1.22075	1.1591
1	1.76039	0.826444	0.921975
